1  
2  
3  
4  
5  
6  
7  
8  
9  
10  
11  
12  
13  
14  
15  
16  
17  
18  
19  
20  
21  
22  
23  
24

**Prolactin and the regulation of parental care and helping behavior in cooperatively breeding white-browed sparrow weaver societies**

Lindsay A. Walker<sup>1</sup>, Linda Tschirren<sup>2</sup>, Jennifer E. York<sup>1,3</sup>, Peter J. Sharp<sup>4</sup>,  
Simone L. Meddle<sup>4</sup>, Andrew J. Young<sup>1\*</sup>

<sup>1</sup> Centre for Ecology and Conservation, University of Exeter Cornwall Campus, Penryn, Cornwall TR10 9EZ, UK

<sup>2</sup> ZHAW School of Life Sciences and Facility Management, Institute of Natural Resource Sciences, Grüental, 8820 Wädenswil

<sup>3</sup> Department of Zoology, University of Cambridge, Downing Street, Cambridge, CB2 3EJ, UK

<sup>4</sup> The Roslin Institute, The Royal (Dick) School of Veterinary Studies, University of Edinburgh, Easter Bush, Midlothian EH25 9RG, Scotland, UK

\* Corresponding author

[A.J.Young@exeter.ac.uk](mailto:A.J.Young@exeter.ac.uk)

Centre for Ecology and Conservation  
College of Life and Environmental Sciences  
University of Exeter, Cornwall Campus  
TR10 9EZ  
UK

KEY WORDS: Cooperation, mechanism, evolution, hormone, helpers

25 ABSTRACT

26 In many cooperatively breeding societies non-breeding individuals help to rear the offspring of breeders.  
27 The physiological mechanisms that regulate such cooperative helping behavior are poorly understood,  
28 but may have been co-opted, during the evolution of cooperative breeding, from pre-existing  
29 mechanisms that regulated parental care. Key among these may be a role for prolactin. Here we  
30 investigate whether natural variation in circulating prolactin levels predicts both parental and helper  
31 contributions to nestling provisioning in cooperatively breeding white-browed sparrow weavers,  
32 *Plocepasser mahali*. In sparrow weaver groups, a single dominant pair monopolize reproduction and  
33 non-breeding subordinates help with nestling feeding. We show that: (i) among parents, dominant  
34 females feed nestlings at higher rates, make longer provisioning visits and have higher prolactin levels  
35 than dominant males; and (ii) among subordinates, engaged in cooperative helping behavior, those  
36 within their natal groups feed nestlings at higher rates and have higher prolactin levels than immigrants.  
37 Moreover, continuous variation in prolactin levels positively predicts nestling-provisioning rates and  
38 mean provisioning visit durations when all bird classes are combined. These relationships are principally  
39 driven by differences among bird classes in both circulating prolactin levels and provisioning traits; the  
40 more limited within-class variation in prolactin and provisioning traits were not evidently correlated,  
41 highlighting a likely role for additional mechanisms in the fine-scale regulation of care. Our findings  
42 broadly support the hypothesis that parental care and cooperative helping behavior are regulated by a  
43 common underlying mechanism and highlight the need for experimentation to now establish the  
44 causality of any role for prolactin.

45 [250 words]

## 46 INTRODUCTION

47 In many cooperatively breeding societies, non-breeding helpers assist with the rearing of parents'  
48 young, via cooperative contributions to diverse forms of care (e.g. incubation, babysitting and offspring  
49 provisioning; Solomon and French 1997, Koenig and Dickinson 2004, 2016). The majority of research  
50 on such 'helping behavior' has sought to explain its evolution, by identifying the effects of helping on  
51 recipients and the means by which these yield fitness benefits to helpers (Cockburn 1998, Dickinson  
52 and Hatchwell 2004, Koenig and Dickinson 2016). By contrast, our understanding of the proximate  
53 physiological mechanisms that regulate the expression of cooperative behavior is less advanced  
54 (Schoech et al. 2004, Soares et al. 2010, Sanderson et al. 2014, Dantzer et al. 2017), despite a surge  
55 of interest in the origins of consistent individual differences in both cooperative behavior and endocrine  
56 traits (Sanderson et al. 2015, English et al. 2010, Dantzer et al. 2019, Houslay et al. 2019). As  
57 cooperatively breeding species commonly evolved from monogamous pair-breeding species in which  
58 parental care was well developed (Cornwallis et al. 2010, Lukas and Clutton-Brock 2012), it seems likely  
59 that the physiological mechanisms that regulate cooperative helping behavior among non-breeders  
60 were co-opted from the pre-existing mechanisms that regulated parental care among breeders.  
61 Attempts to identify the proximate mechanisms that regulate helping behavior may therefore be well  
62 served by testing candidate mechanisms already identified for the regulation of parental care in non-  
63 cooperative species (Ziegler 2000, Schoech et al. 2004, Carlson et al. 2006a, 2006b). One such  
64 mechanism is the neuroendocrine pathway involving the anterior pituitary gland hormone prolactin  
65 (Buntin 1996, Sharp et al. 1998, Ziegler 2000, Carlson et al. 2006a, 2006b, Angelier et al. 2016).

66

67 Numerous studies suggest that prolactin can play a causal role in the expression of parental care,  
68 though its precise role is not clear and seems likely to vary across taxa (Buntin 1996, Sharp et al. 1998,  
69 Angelier et al. 2016). In birds, prolactin is thought to play a causal role in the onset and maintenance of  
70 parental care, but it is less clear whether variation in circulating prolactin levels is also involved in the  
71 quantitative regulation of contributions to care once caring behavior has begun (Boos et al. 2007,

72 Angelier et al. 2016, Smiley and Adkins-Regan 2018). The transition from sexual activity to parenting is  
73 typically associated with an increase in circulating prolactin levels, which peak during the care period  
74 (Buntin 1996, Sharp et al. 1998, Angelier et al. 2016, e.g. Schoech et al. 1996, Badyaev and Duckworth  
75 2005). Evidence that naturally low prolactin levels are commonly associated with breeding attempt  
76 abandonment and/or failure (e.g. Chastel and Lormee 2002, Chastel et al. 2005), and that experimental  
77 reductions in circulating prolactin levels during late incubation can disrupt post-natal care (e.g. Smiley  
78 and Adkins-Regan 2018), suggest that these elevated prolactin levels are necessary for the onset and/or  
79 maintenance of parental care. Indeed, experimental elevations of circulating prolactin suggest that  
80 elevated prolactin levels can promote the onset of both incubation behavior (e.g. Sockman et al. 2000)  
81 and nestling provisioning behavior (e.g. Badyaev and Duckworth 2005). Positive associations between  
82 continuous variation in circulating prolactin levels and the rates at which parents provision their offspring  
83 (e.g. Duckworth et al. 2003, Ouyang et al. 2011) highlight the possibility that prolactin levels also regulate  
84 the *amount* of care that an actively caring parent provides to its offspring. However, this hypothesis has  
85 yet to be experimentally tested, and such positive associations could arise instead via effects of  
86 provisioning activity on a bird's circulating prolactin levels, as parental contact with offspring cues can  
87 increase prolactin secretion (Hall 1987, Sharp et al. 1998). Causal links between prolactin and  
88 provisioning rates may therefore exist in both directions. Indeed, such a feedback loop (in which  
89 offspring cues stimulate prolactin secretion that in turn maintains and/or elevates the expression of  
90 parental care) could conceivably both maintain parental care while offspring survive, and regulate its  
91 expression according to offspring vigor and need.

92

93 A number of studies of cooperatively breeding species have now begun to investigate the relationships  
94 between prolactin and care-giving behavior, both among parents and non-breeding helpers (Ziegler  
95 2000, Schoech et al. 2004, Soares et al. 2010). Prolactin levels have been shown to rise in parents and  
96 non-breeding helpers during the transition to incubation and nestling care in at least three species of  
97 cooperatively breeding bird (Schoech et al. 1996, Brown and Vleck 1998, Khan et al. 2001, see also

98 Vleck et al. 1991). While few studies have investigated specifically whether variation in circulating  
99 prolactin levels predicts variation in cooperative contributions to helping, studies of at least two  
100 cooperative breeders have yielded compelling evidence in this regard. In Florida scrub jays  
101 (*Aphelocoma coerulescens*), breeders fed offspring at higher rates than non-breeders and showed  
102 higher circulating prolactin levels (Schoech et al. 1996, see also Vleck et al. 1991), and those non-  
103 breeders that helped to feed offspring showed higher prolactin levels than those that did not (Schoech  
104 et al. 1996). Indeed, continuous variation in circulating prolactin levels predicted continuous variation in  
105 feeding contributions, both among all birds combined and specifically among non-breeders (Schoech et  
106 al. 1996). Similarly, in cooperatively breeding meerkat (*Suricata suricatta*) societies, continuous variation  
107 in the prolactin levels of helpers positively predicted their cooperative contributions to both babysitting  
108 and pup-feeding (Carlson et al. 2006a, 2006b). In the pup-feeding study, prolactin levels only predicted  
109 the pup-feeding rates of helpers in statistical models that did not allow for an independent positive effect  
110 of circulating cortisol levels on the animal's pup-feeding rates (Carlson et al. 2006a). Experimental work  
111 since highlights that this putative positive effect of cortisol on pup-feeding rates may not have been  
112 causal, however, as glucocorticoid receptor blockade increased rather than decreased pup-feeding  
113 rates among meerkat helpers (Dantzer et al. 2017). Such relationships between circulating prolactin  
114 levels and helping behavior are not always apparent. For example, prolactin levels did not predict the  
115 offspring provisioning rates of helpers in red-cockaded woodpecker (*Picoides borealis*) groups (Khan et  
116 al. 2001), and the pituitary gland prolactin mRNA levels of a cooperatively breeding fish were not  
117 evidently related to care-giving behavior (Bender et al. 2008); though the relevant sample sizes in both  
118 studies were modest.

119

120 The likelihood that glucocorticoids play a role in mediating the state-dependence of cooperative helping  
121 (Sanderson et al. 2014, Dantzer et al. 2017, see also Angelier and Chastel 2009, Angelier et al. 2016),  
122 coupled with the expectation that other neuroendocrine pathways also modulate helping potentially  
123 independent of circulating prolactin levels (Schoech et al. 1998, Ziegler 2000, Young et al. 2005, Carlson

124 et al. 2006a), highlights the potential complexity of seeking relationships between continuous variation  
125 in prolactin levels and care. Notably too, given the potential for contact with offspring to raise circulating  
126 prolactin levels (Sharp et al. 1998, Hall 1987), it is possible that the prolactin-helping associations  
127 documented above arose not via causal effects of prolactin on care, but via either the reverse causal  
128 relationship or in the absence of any causal link between the two. Nevertheless, the promising findings  
129 to date highlight the need for further studies to investigate whether natural circulating levels of prolactin  
130 predict variation in individual contributions to both parental care and helping behavior in cooperatively  
131 breeding species, and ultimately the use of experimental manipulations of prolactin levels to test the  
132 causality and nature of any relationships detected (Sockman et al. 2000, Carlson et al. 2003, Badyaev  
133 and Duckworth 2005, Smiley and Adkins-Regan 2018).

134

135 Here we investigate whether natural variation in circulating prolactin levels positively predicts the  
136 nestling provisioning behavior of both parents and non-breeding helpers in a wild cooperatively breeding  
137 bird, the white-browed sparrow-weaver (*Plocepasser mahali*). White-browed sparrow weavers are rain-  
138 dependent breeders that live in year-round territorial groups throughout the semi-arid regions of sub-  
139 Saharan Africa (Lewis 1982, Wood et al. 2021). Within each social group, a single dominant male and  
140 female completely monopolize within-group reproduction and up to 10 non-breeding subordinates of  
141 both sexes help to feed their nestlings (Harrison et al. 2013a, 2013b, Capilla-Lasheras et al. 2021).  
142 Subordinates are typically offspring from previous broods that have delayed dispersal from their natal  
143 group (and so are helping to rear their parents' young), but subordinate immigrants of both sexes do  
144 also occur (Harrison et al. 2013a, 2013b, Harrison et al. 2014). Subordinates contribute to several  
145 cooperative activities year-round, including territorial defense, roost construction and anti-predator  
146 vigilance (Lewis 1982, Walker et al. 2016, York et al. 2019), and during breeding periods they contribute  
147 substantially to nestling provisioning (Cram et al. 2015a, Capilla-Lasheras et al. 2021). Helping behavior  
148 by subordinates has a causal positive effect on the overall rate at which nestlings are fed (Capilla-  
149 Lasheras et al. 2021), and appears to reduce environmentally-induced variance in the reproductive

150 success of the dominant pair (Capilla-Lasheras et al. 2021) and lighten the post-natal provisioning  
151 workload of the dominant female (Capilla-Lasheras 2019). While the neuroendocrine correlates of white-  
152 browed sparrow weaver reproduction, aggression and song production have been investigated (e.g.  
153 Wingfield and Lewis 1993, Voigt et al. 2007, York et al. 2016), the regulation of parental and helper  
154 contributions to offspring provisioning remains unexplored.

155

156 We test three predictions of the hypothesis that prolactin plays a role in regulating the expression of  
157 both parental care (among dominants) and cooperative helping behavior (among non-breeding  
158 subordinates) in cooperatively breeding societies. First, with regard to parental care, we predict that  
159 differences between the nestling provisioning rates of dominant females and dominant males will be  
160 mirrored by parallel differences in their mean circulating prolactin levels. Dominant females are expected  
161 to provision nestlings at higher rates and to have higher prolactin levels than dominant males (as the  
162 12-18% incidence of extra-group paternity in this population leaves dominant females more closely  
163 related than dominant males, on average, to the offspring that they rear; Harrison et al. 2013a). Second,  
164 with regard to helping behavior, we predict that differences between the nestling provisioning rates of  
165 subordinates still residing within their natal group (hereafter 'natal subordinates') and immigrant  
166 subordinates, will also be mirrored by parallel differences in their mean circulating prolactin levels. Natal  
167 subordinates are expected to provision nestlings at higher rates than immigrants, as while the former  
168 are typically rearing future generations of siblings born to their parents, the latter will typically be  
169 unrelated to the nestlings in their group (Harrison et al. 2013a). Finally, we predict that continuous  
170 variation in circulating prolactin levels will positively predict continuous variation in the provisioning rates  
171 of birds, and that this relationship will be apparent (i) at the population level (when all four of the bird  
172 classes above are combined), and (ii) within bird classes, having factored out the among-class  
173 differences in prolactin levels and provisioning rates.

174

175

176 METHODS

177 *General field methods*

178 Data were collected in the context of a long-term research project that monitors ~40 cooperative groups  
179 of white-browed sparrow weavers at Tswalu Kalahari Reserve, South Africa (27°160S, 22°250E). Data  
180 were collected at a similar time in two separate breeding seasons (January to February 2013, and  
181 January to March 2014). White-browed sparrow weavers in this population may breed at any time from  
182 September through to May (the Southern summer), depending on the timing of unpredictable summer  
183 rainfall (Capilla-Lasheras 2019, Wood et al. 2021). Each bird within our study population is fitted with a  
184 metal ring and three color rings, providing a unique ring combination for identification in the field  
185 (SAFRING license 1444). From around six months of age, males and females of the focal subspecies  
186 (*Plocepasser mahali mahali*) can be distinguished by their bill color; males have a dark brown bill while  
187 females have a paler grey-to-pink bill (Leitner et al. 2009). Dominance status and social group  
188 compositions were determined via regular (at least twice weekly) group visits. Social dominance was  
189 assigned based on the monitoring of key dominance-related behaviors: the dominant pair routinely  
190 displace other group members and produce synchronized duet song, the dominant female is the sole  
191 incubator, and the dominant male consistently produces dawn song during breeding periods (Harrison  
192 et al. 2013a, Cram et al. 2015b, York et al. 2016). The dispersal status (natal or immigrant) of  
193 subordinate birds was determined via the continuous monitoring of the study population since 2007.  
194 Based on this information, four classes of birds were assigned: Dominant Females; Dominant Males;  
195 Natal Subordinates and Immigrant Subordinates. Social group size was defined as the number of adult  
196 (> 1 year of age) birds consistently seen foraging and roosting together at the time of the focal breeding  
197 attempt. The breeding status of each group was determined by monitoring the contents of all woven  
198 nest structures within each group's territory, at least every other day throughout the two study periods.  
199 When one or more eggs were newly detected, the active nest was visited daily in the afternoon until no  
200 new eggs were detected (the birds lay one egg per day in the morning, and typically lay clutches of 2  
201 eggs (range 1-4); Harrison et al. 2013a). To determine hatch dates, daily monitoring of the active nest



202 resumed 14 days after the detection of the first egg (as incubation lasts 14-19 days; Harrison et al.  
203 2013a). This method yielded accurate information on the day on which the first nestling in each clutch  
204 hatched, which was termed 'Day 1' of the nestling provisioning period for the focal breeding attempt. All  
205 protocols were approved by the Ethics Committees of the Universities of Exeter and Pretoria and  
206 complied with regulations stipulated in The Association for the Study of Animal Behaviour (ASAB)  
207 Guidelines for Use of Animals in Research.

208

### 209 *Monitoring provisioning behavior*

210 To identify individuals during the recording of nestling provisioning events, group members were  
211 captured from their roost chambers during the incubation period (details below) and marked on the vent  
212 with a unique dye-mark. The dominant female was left unmarked to minimize disturbance during  
213 incubation, but could still be distinguished from other group members by being the only unmarked bird  
214 within her group (only resident group members provision offspring). To record provisioning events, a  
215 Panasonic SDR-S50 camcorder attached to a tripod (approximately 0.5 meters in height) was placed  
216 on the ground beneath the entrance to the active nest two days before recording commenced (to allow  
217 the birds to habituate to it). On the days of provisioning monitoring, the recordings were started between  
218 06:15 and 07:54, with this start time being adjusted through the season to maintain an approximately  
219 constant time offset from sunrise, and an expected video duration of approximately 3 hours. Provisioning  
220 videos were collected in this way for all focal breeding attempts (n = 37 broods across 30 social groups)  
221 on two mornings between Days 6 and 9 inclusive of the nestling provisioning period (typically for the  
222 two consecutive mornings of Days 7 and 8; nestlings fledged from day 20). This approach yielded a  
223 mean total duration of provisioning video of 6.08 hours (range 4.05 – 8.12 hours) per breeding attempt.

224

225 Video recordings were transcribed using VLC Media Player version 2.2, with the observer recording, for  
226 each provisioning visit, the identity of the bird visiting the nest (determined via their distinct dye mark  
227 and bill color, which reveals their sex) and the duration of time that they spent within the nest (the time

228 elapsed between passing in and out of the enclosed nest structure; hereafter 'Provisioning visit  
229 duration'). Prior work on this study population using within-nest cameras has shown that all nest visits  
230 during the nestling age window studied here entail the delivery of a single prey item to the brood, unless  
231 the visiting bird is carrying a feather or grass in which case no food is delivered (Walker 2016). We  
232 therefore excluded such feather- or grass-carrying nest visits from our provisioning visit records. From  
233 the transcribed data for each focal brood we then calculated two provisioning trait values for each adult  
234 group member: (i) 'Provisioning rate' (feeds / hr) was calculated as the total number of provisioning visits  
235 that the bird conducted over the two monitored mornings divided by the total duration of video collected  
236 over those two mornings, and (ii) 'Mean Visit Duration' (minutes) was calculated as the mean duration  
237 of all provisioning visits conducted by the focal bird over the two monitored mornings.

238

### 239 *Bird capture and blood sampling*

240 To obtain a matched blood sample for prolactin measurement, we attempted to capture and blood  
241 sample all adult (> 1 year old at the time of sampling) birds within the monitored brood's social group on  
242 the evening of the second day of provisioning behavior recording. Birds were captured individually at  
243 night from the woven roost chambers within their group's territory (Cram et al. 2015a) by flushing  
244 individuals into a custom-made capture bag. All captures, leg ring fitting, dye-marking and blood  
245 sampling were conducted by a single investigator. Birds were then immediately returned to a roost  
246 chamber within their territory to pass the remainder of the night. Upon capture, a blood sample (c. 140  
247  $\mu\text{L}$ ) was taken from the brachial vein of the bird using a 26-g needle and heparinized capillary tubes.  
248 Captures occurred soon after dusk, once the birds were roosting in their woven chambers. Time of  
249 capture was recorded (to allow us to fit the time lag from sunset to capture as a covariate predictor in  
250 our prolactin analyses, in case of diel variation and/or effects of the time elapsed since roosting on a  
251 bird's prolactin levels), along with the time lag between capture and the completion of blood sampling  
252 (mean  $\pm$  standard deviation [S.D.]:  $3.12 \pm 0.73$  minutes [range 1.65 – 4.78 minutes]; to allow us to control  
253 for potential mean effects of capture stress on prolactin levels in our statistical models). Blood samples

254 were immediately centrifuged in the field (12,000 g for 3 minutes; Haematospin 1400; Hawksley Medical  
255 and Laboratory Equipment, Lancing, UK) and the plasma was drawn off and stored in a cryovial on ice  
256 until it could be transferred to liquid nitrogen on return from the field (mean  $\pm$  S.D. time lag from sample  
257 collection to storage on liquid nitrogen =  $148 \pm 63$  min). At the end of the field season, samples were  
258 transferred to the UK on dry ice and then stored at -80 degrees Celsius until analysis for prolactin.

259

### 260 *Prolactin Radioimmunoassay*

261 The prolactin assay was carried out at the Roslin Institute (University of Edinburgh, Easter Bush,  
262 Midlothian, Scotland, UK). Plasma prolactin levels were measured using a highly specific heterologous  
263 micro-radioimmunoassay of donkey anti-rabbit serum to European starling (*Sturnus vulgaris*) prolactin  
264 (Sharp antibody code 44/2). Prolactin was radiolabeled with iodine<sup>125</sup> using chloramine-T. 168 (out of a  
265 total of 208) samples were assayed in duplicate, and the remaining 40 samples were assayed as  
266 singletons (not all samples assayed were for use in this study). All samples were measured in a single  
267 assay, in which the intra-assay coefficient of variation for the duplicate samples was 3.31%.

268

### 269 *Statistical methods*

270 The above methods yielded a final data set of matched provisioning trait data (estimated from the focal  
271 bird's average performance over two mornings of provisioning recordings; see above) and circulating  
272 prolactin levels (when sampled on the evening of the second day of provisioning monitoring) for 70  
273 different adult birds, each sampled once (for all traits), while feeding a total of 37 broods across 30 social  
274 groups. For a small number of these birds, a second matched measure of the provisioning traits and  
275 prolactin levels was also available from a subsequent breeding attempt. However, these few repeat  
276 measures were not included in our final data set for analysis, as attempts to conduct mixed effects  
277 models using bird ID to account for the presence of these repeated measures of individuals typically  
278 failed to estimate non-zero variance for bird ID (quite possibly because too few repeated measures were

279 available). All analyses therefore utilized the data from only the first sampling event per bird, obviating  
280 the need to include bird ID as a random effect within our mixed effects models (see below). While some  
281 analyses utilized the whole data set (i.e.  $n = 70$  adults birds each sampled once for all traits), others  
282 used subsets of it (e.g. when focusing only on dominants or subordinates), and so the sample sizes for  
283 each analysis are reported within the relevant results section and model output table. As mean  
284 provisioning visit duration data were only available for birds that had a non-zero provisioning rate, the  
285 sample sizes for mean visit duration analyses were sometimes smaller than those for provisioning rate.

286

287 All statistical models and visualizations were carried out in R (version 4.1.0; R Core Team). Mixed effects  
288 modelling was conducted using the R package 'lme4' (Bates et al. 2015), and the importance of a given  
289 combination of model predictors was assessed using an information-theoretic (IT) approach. Each  
290 modelling exercise started with the specification of a 'global model' containing all predictors of interest.  
291 This global model and all possible simpler models containing subsets of the global model's fixed effect  
292 predictors (including the intercept-only model) were then fitted to the data using maximum likelihood  
293 and ranked based on AICc (Akaike's Information Criterion corrected for small sample size; Burnham  
294 and Anderson 2002). This 'all subsets' approach was appropriate as all simpler models were biologically  
295 plausible.  $\Delta$ AICc values (i.e. the difference in AICc between the focal model and the best supported 'top'  
296 model) were then calculated for every model fitted. As lower AICc values are indicative of stronger  
297 statistical support for a given model, the  $\Delta$ AICc for the best-supported 'top' model = 0 and models that  
298 attracted less statistical support had progressively more positive  $\Delta$ AICc values. We gave consideration  
299 to models within a  $\Delta$ AICc value of six (Richards 2008, Richards et al. 2011) and subsequently reduced  
300 this  $\Delta 6$  'top model set' by applying the 'nesting rule' described in (Richards 2008). This rule aims to  
301 avoid the retention of overly complex models that do not improve model fit, by discarding models that  
302 are more complex versions of simpler (nested) models with weaker AIC support (Richards 2008, Arnold  
303 2010). Adding variables with little or no explanatory power to a top model can weaken AIC by less than  
304 6 points, leading to the retention within the  $\Delta 6$  top model set of more complex versions of better  
305 supported models, containing such uninformative variables (Arnold 2010). The nesting rule thus reduces

306 the chance of considering such overly complex models containing uninformative variables (Richards  
307 2008). In the model selection tables presented within the main paper (Tables 1 & 2) each line presents  
308 a model from the top model set (i.e. those models within  $\Delta AICc = 6$  of the best-supported model) after  
309 the application of the nesting rule, while each of the fixed effect (predictor) columns presents the  
310 estimated effect size for that fixed effect predictor within that model (or is blank if the focal fixed effect  
311 was absent from that model). The corresponding full top model sets *prior* to the application of the nesting  
312 rule are presented in the Appendices (Tables A1 & A2) in case of interest. The specific modelling  
313 exercises conducted for each results section are described below.

314

315 **1. Are differences in the nestling provisioning rates and nest visit durations of dominant females**  
316 **and males (engaged in parental care) mirrored by differences in their circulating prolactin levels?**

317 We used two separate mixed effects models with Gaussian error structure to model the causes of  
318 variation in (i) the provisioning rates and (ii) the mean provisioning visit durations of dominant birds. The  
319 two modeling exercises began with an identical global model structure. In addition to the primary  
320 predictor of interest, 'bird class' (dominant female or dominant male), we fitted the following terms as  
321 fixed effect predictors: brood size (the brood size being fed), adult group size (the number of adult group  
322 members during the focal nestling provisioning period) and year (a two-level factor capturing the year in  
323 which sampling occurred; 2013 or 2014). We fitted both social group ID and brood ID (the identity of the  
324 brood being fed) as random effects, retaining them in the model structure regardless of the degree of  
325 variance that they explained.

326

327 We then used a third mixed effects model with Gaussian error structure to model the causes of variation  
328 in the circulating prolactin levels of dominant birds, starting with a global model structure containing the  
329 same fixed and random effect predictors as the provisioning trait models just described, but with the  
330 addition of two further fixed effects to account for potential methodological effects on prolactin  
331 concentrations: (i) the time lag from sunset to the bird's capture for blood sampling (to allow for the

332 possibility of diel variation in prolactin levels and/or changes in prolactin levels once the birds entered  
333 their roosts) and (ii) the time lag from capture to the completion of blood sampling (to allow for possible  
334 effects of capture stress on circulating prolactin levels). While neither of these two time-lag variables  
335 were present within the best-supported model that arose from model comparisons (suggesting no  
336 appreciable effect of these variables on circulating prolactin levels; Table 1), we nevertheless verified  
337 that our inferences regarding the effect of bird class on prolactin levels on the basis of the best-supported  
338 model overall were also upheld by the best-supported model that contained both of these time lag terms  
339 (see results text).

340

341 **2. Are differences in the provisioning rates of natal and immigrant subordinates (engaged in**  
342 **cooperative helping behavior) mirrored by differences in their circulating prolactin levels?**

343 We then used two mixed effects models with Gaussian error structure to model the causes of variation  
344 in the provisioning rates and prolactin levels of subordinate birds engaged in helping behavior. We fitted  
345 the same set of fixed and random effect predictors to these models as were fitted to the corresponding  
346 provisioning rate and prolactin level models conducted for dominant birds (see above) with two  
347 exceptions: (i) here 'bird class' reflected whether the bird was a natal subordinate or an immigrant  
348 subordinate, and (ii) here only brood ID was fitted as a random effect (social group ID was not, as all  
349 subordinate birds from any given social group were sampled while feeding the same single brood,  
350 leaving brood ID and social group ID with identical structure in this case). Again, we verified that our  
351 inferences regarding the effect of bird class on prolactin levels on the basis of the best-supported model  
352 overall were also upheld by the best-supported model that contained both of the methodological time  
353 lag terms (see results text). We did not model the causes of variation in the mean provisioning visit  
354 durations of subordinates as too few immigrant subordinates actually provisioned the focal broods,  
355 leaving us with an insufficient sample size of measures of the provisioning visit durations of this bird  
356 class.

357

358 **3. Does continuous variation in prolactin levels predict continuous variation in provisioning**  
359 **rates?**

360 To investigate whether natural variation in prolactin levels predicted continuous variation in the birds'  
361 nestling provisioning rates and mean provisioning visit durations at the population level (i.e. when all  
362 bird classes were combined) we conducted two mixed effect models (one for each provisioning trait  
363 response term), with circulating prolactin concentration as the sole fixed effect predictor (as we have  
364 not hypothesized specific mechanisms by which other variables might impact provisioning traits  
365 independent of prolactin levels) and social group ID and brood ID as random effects. Mean provisioning  
366 visit duration was logarithm transformed for analysis, to normalize model residuals. Inspection of the  
367 patterns of the mean prolactin levels and provisioning trait values of the different bird classes (i.e.  
368 dominant females, dominant males, natal subordinates and immigrant subordinates) suggested that any  
369 such continuous relationship between prolactin levels and provisioning trait values at the population  
370 level could be driven principally by the variation in these traits *among* the bird classes (Figures 3a & 3c).  
371 In order to then investigate whether the more limited variation in circulating prolactin levels *within* bird  
372 classes predicted the *within*-class variation in provisioning trait values, we first mean-centered each  
373 birds' prolactin level and provisioning trait values (the log transformed values in the case of mean  
374 provisioning visit duration) around the mean value of the focal trait for birds of their class (by subtracting  
375 from it the mean value of the focal trait for their bird class). We then conducted two mixed effects models  
376 (one for each mean-centered provisioning trait response term), with mean-centered circulating prolactin  
377 concentration as the sole fixed effect predictor and social group ID and clutch ID as random effects.

378 RESULTS

379 **1. Are differences in the nestling provisioning rates and nest visit durations of dominant females**  
380 **and males (engaged in parental care) mirrored by differences in their circulating prolactin levels?**

381 Analyzing the provisioning behavior of dominant birds engaged in parental care (n = 46 dominants, 20  
382 females and 26 males, feeding 31 broods at 28 social groups) revealed strong evidence that dominant  
383 females feed offspring at higher rates than dominant males (Figure 1a; bird class was present in all  
384 models down to  $\Delta\text{AICc} = 42.36$ ; Table 1) and that the mean provisioning visit durations of dominant  
385 females are also longer than those of dominant males (Figure 1b;  $\Delta\text{AICc} = 11.49$ ; Table 1). There was  
386 also evidence that brood size positively predicted the provisioning rates of dominant birds ( $\Delta\text{AICc} =$   
387  $1.92$ ; Table 1), but not their mean visit durations (the best-supported visit duration model containing  
388 brood size scored 1.42 AICc points below the top model and was rejected under the nesting rule; Table  
389 1; Table A1). There was no compelling evidence that the provisioning rates or mean visit durations of  
390 dominant birds were associated with either the year of study or adult group size (which were absent  
391 from the best-supported model for both traits; Table 1).

392

393 Analyzing the circulating prolactin levels of dominant birds during the provisioning periods analyzed  
394 above (again, n = 46 dominants, 20 females and 26 males, feeding 31 broods at 28 social groups)  
395 revealed strong evidence that dominant females also have higher circulating prolactin levels than  
396 dominant males (Figure 1c; bird class was present in all models down to  $\Delta\text{AICc} = 19.93$ ; Table 1). There  
397 was no compelling evidence that the prolactin levels of dominants were associated with group size,  
398 brood size, the time lag from sunset to capture or the time lag from capture to blood sampling (none of  
399 which were present within the best-supported model; Table 1). Among the considered models that  
400 included both of the methodological time lag terms (i.e. those models forced to account for any effects  
401 of these terms, regardless of their importance), the best-supported model again contained an effect of  
402 bird class (see Table A1; model number 22).

403



404

405

406

407

408

409

410

411

412

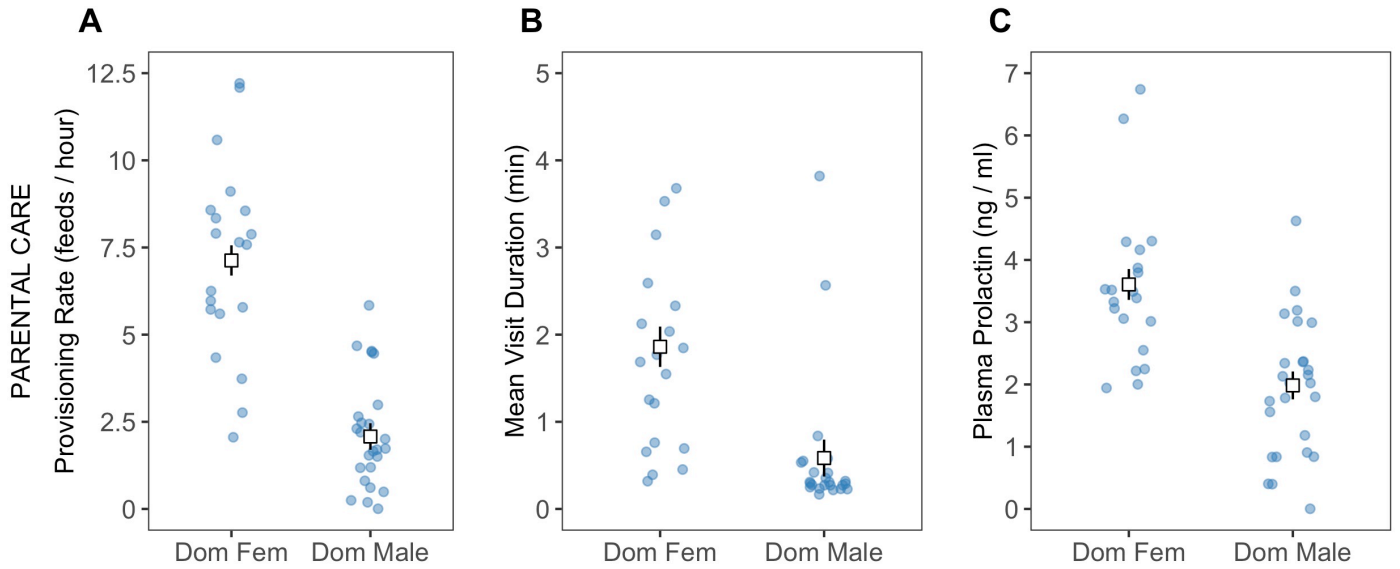

413 **Figure 1.** The (a) provisioning rates, (b) mean provisioning visit durations, and (c) circulating prolactin  
414 concentrations of dominant females (Dom Fem) and dominant males (Dom Male) engaged in parental  
415 care. Squares and error bars present the predicted means  $\pm$  S.E. from the top model for the relevant  
416 trait (Table 2) while controlling for the effects of the other variables present in that model. The points  
417 show the raw data points.

418 **Table 1. Modelling the Provisioning Behavior and Prolactin Levels of DOMINANTS**

419 Model selection of the factors affecting the (i) nestling provisioning rates, (ii) mean provisioning visit  
 420 durations and (iii) prolactin levels of dominant females ('Dom Fem') and dominant males ('Dom Male')  
 421 engaged in parental care. The table shows all models within  $<6 \Delta AICc$  of the top model, after applying  
 422 the model nesting rule (Richards et al., 2011; see methods). The grey lines indicate the response term  
 423 for the set of models beneath it. The numbers indicate coefficients ( $\pm$  standard errors; S.E.) and df is  
 424 the degrees of freedom. The 'Year' effect is the change from 2013 to 2014. Bird Class was present  
 425 within all models down to  $\Delta AICc = 42.36$  in the provisioning rate analysis, all models down to  $\Delta AICc =$   
 426  $11.49$  in the mean visit duration analysis, and all models down to  $\Delta AICc = 19.93$  in the prolactin analysis.  
 427  $N = 46$  dominant birds, 20 female and 26 male, feeding 31 broods at 28 social groups for the provisioning  
 428 rate and prolactin level analyses. The sample size for the mean provisioning visit duration analysis was  
 429 slightly smaller ( $n = 44$  dominant birds), as 2 dominant males did not provision their brood, leaving us  
 430 without a measure of their mean visit duration. Table A1 presents these top model sets prior to  
 431 application of the model nestling rule.

| Intercept                                              | Bird Class<br>(Dom Fem vs<br>Dom Male) | Brood<br>Size  | Group<br>Size | Year           | df | AICc  | $\Delta AICc$ |
|--------------------------------------------------------|----------------------------------------|----------------|---------------|----------------|----|-------|---------------|
| <b>(i) Provisioning Rate (feeds / hr)</b>              |                                        |                |               |                |    |       |               |
| -0.36<br>(0.87)                                        | 5.05<br>(0.58)                         | 1.44<br>(0.46) |               |                | 6  | 205.8 | 0.00          |
| 1.21<br>(0.50)                                         | 5.12<br>(0.59)                         |                |               | 1.59<br>(0.59) | 6  | 207.7 | 1.92          |
| 2.06<br>(0.42)                                         | 5.12<br>(0.61)                         |                |               |                | 5  | 211.8 | 5.98          |
| <b>(ii) Mean Provisioning Visit Duration (minutes)</b> |                                        |                |               |                |    |       |               |
| 0.58<br>(0.21)                                         | 1.28<br>(0.31)                         |                |               |                | 5  | 139.7 | 0.00          |
| <b>(iii) Plasma Prolactin (ng / ml)</b>                |                                        |                |               |                |    |       |               |
| 1.98<br>(0.22)                                         | 1.62<br>(0.25)                         |                |               |                | 5  | 149.6 | 0.00          |

432 **2. Are differences in the provisioning rates of natal and immigrant subordinates (engaged in**  
433 **helping behavior) mirrored by differences in their circulating prolactin levels?**

434 Analyzing the provisioning behavior of subordinate birds engaged in cooperative helping behavior (n =  
435 24 subordinates, 17 natal and 7 immigrant, feeding 16 broods at 16 social groups) revealed evidence  
436 that subordinates within their natal groups feed offspring at higher rates than immigrant subordinates  
437 (Figure 2a; bird class was present in all models down to  $\Delta AICc = 10.64$ ; Table 2). There was also  
438 evidence that brood size positively predicted subordinate provisioning rates ( $\Delta AICc = 2.13$ ; Table 2).  
439 There was no compelling evidence that helper provisioning rates were associated with either group size  
440 or the year of study (neither term was present within the best-supported model; Table 2). No analysis of  
441 the provisioning visit durations of subordinates was conducted as an insufficient number of subordinate  
442 immigrants ever provisioned the broods (see Figure 2a).

443

444 Analyzing the circulating prolactin levels of subordinate birds during the provisioning periods analyzed  
445 above (again, n = 24 subordinates, 17 natal and 7 immigrant, feeding 16 broods at 16 social groups)  
446 revealed that natal subordinates also have higher prolactin levels than immigrant subordinates (Figure  
447 2b; bird class was present in all models down to  $\Delta AICc = 4.15$ ; Table 2). There was also evidence that  
448 subordinate prolactin levels were negatively associated with group size ( $\Delta AICc = 4.15$ ) and very weak  
449 evidence that they were higher in the second year of study ( $\Delta AICc = 0.02$ ). There was no compelling  
450 evidence that subordinate prolactin levels were associated with brood size or the time lags from sunset  
451 to capture and from capture to blood sampling (none of which appeared in the best-supported model;  
452 Table 2). Among the considered models that included both of the methodological time lag terms (i.e.  
453 those models forced to account for any effects of these terms, regardless of their importance), the best-  
454 supported model again contained an effect of bird class (see Table A2; model number 30).

455

456

457

458

459

460

461

462

463

464

465

466

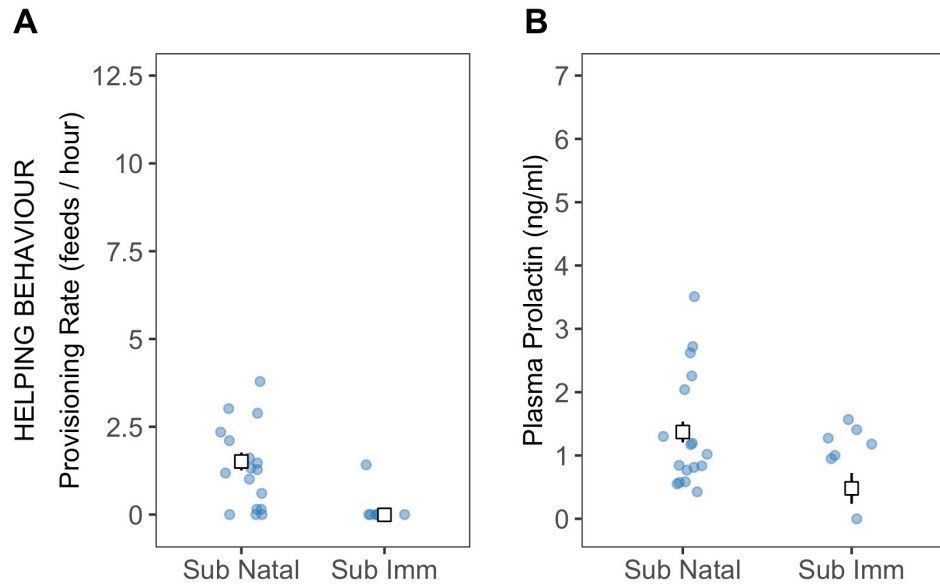

467 **Figure 2.** The (a) provisioning rates, and (b) circulating prolactin levels of natal subordinates (Sub Natal)  
468 and immigrant subordinates (Sub Imm) engaged in cooperative helping behavior, feeding the broods of  
469 the dominant male and female. Y axis scales match those in Figure 1 to facilitate comparison. Squares  
470 and error bars (which do not always extend beyond the square) present the predicted means  $\pm$  S.E.  
471 from the top model for the relevant trait (Table 2) while controlling for the effects of the other variables  
472 present in that model. The points show the raw data points. No analysis of provisioning visit durations  
473 was conducted as an insufficient number of subordinate immigrants ever provisioned the broods (see  
474 panel 2a).

475 **Table 2. Modelling the Provisioning Behavior and Prolactin Levels of SUBORDINATES**

476 Model selection of the factors affecting the (i) nestling provisioning rates, and (ii) prolactin levels of natal  
 477 subordinates ('Sub Natal') and immigrant subordinates ('Sub Imm') engaged in cooperative helping  
 478 behavior. The table shows all models within <math><6 \Delta AIC</math> of the top model, after applying the model nesting  
 479 rule (Richards et al., 2011; see methods). The grey lines indicate the response term for the set of models  
 480 beneath it. The numbers indicate coefficients ( $\pm$  standard errors; S.E.) and df is the degrees of freedom.  
 481 The 'Year' effect is the change from 2013 to 2014. Bird Class was present within all models down to  
 482  $\Delta AICc = 10.64$  in the provisioning rate analysis. N = 24 subordinate birds, 17 natal and 7 immigrant,  
 483 feeding 16 broods at 16 social groups. Table A2 presents these top model sets prior to application of  
 484 the model nestling rule.

485

| Intercept                                 | Bird Class<br>(Sub Natal vs<br>Sub Imm) | Brood<br>Size  | Group<br>Size   | Year           | df | AICc  | $\Delta AICc$ |
|-------------------------------------------|-----------------------------------------|----------------|-----------------|----------------|----|-------|---------------|
| <b>(i) Provisioning Rate (feeds / hr)</b> |                                         |                |                 |                |    |       |               |
| -1.39<br>(0.68)                           | 1.52<br>(0.34)                          | 0.92<br>(0.37) |                 |                | 5  | 66.6  | 0.00          |
| 0.12<br>(0.34)                            | 1.49<br>(0.37)                          |                |                 |                | 4  | 68.8  | 2.13          |
| <b>(ii) Plasma Prolactin (ng/ml)</b>      |                                         |                |                 |                |    |       |               |
| 2.20<br>(0.54)                            | 0.89<br>(0.28)                          |                | -0.41<br>(0.13) | 0.56<br>(0.28) | 6  | 57.13 | 0.00          |
| 2.82<br>(0.48)                            | 0.91<br>(0.31)                          |                | -0.51<br>(0.12) |                | 5  | 57.15 | 0.02          |
| 1.02<br>(0.17)                            |                                         |                |                 | 0.86<br>(0.32) | 4  | 61.28 | 4.15          |
| 2.74<br>(0.56)                            |                                         |                | -0.34<br>(0.13) |                | 4  | 61.42 | 4.29          |

486

487 **3. Does continuous variation in prolactin levels predict continuous variation in provisioning**  
488 **rates?**

489 Our analysis at the population level, including birds of all classes, revealed strong evidence that a bird's  
490 circulating prolactin level positively predicts both its provisioning rate (Figure 3a; effect size  $\pm$  S.E. =  
491  $1.20 \pm 0.23$ ; the provisioning rate model containing the prolactin predictor scored 20.36 AICc points  
492 stronger than the intercept-only model;  $n = 70$  birds feeding 37 broods at 30 social groups) and its mean  
493 provisioning visit duration (Figure 3c; effect size  $\pm$  S.E. =  $0.32 \pm 0.076$ ; the mean visit duration model  
494 containing the prolactin predictor scored 12.59 AICc points stronger than the intercept-only model;  $n =$   
495 59 birds feeding 36 broods at 30 social groups). Plotting out the mean prolactin levels and provisioning  
496 trait values of the different bird classes (Figure 3a & 3c), reveals that both of these population-level  
497 relationships between prolactin and provisioning traits are driven in large part by the among-bird-class  
498 differences in prolactin levels being mirrored by parallel among-bird-class differences in mean  
499 provisioning rate (Figure 3a) and mean provisioning visit duration (Figure 3c). Indeed, after mean-  
500 centering each bird's prolactin level and provisioning trait values around the focal trait's mean value for  
501 their bird class, we found no evidence that within-bird-class variation in prolactin levels predicted within-  
502 bird-class variation in either provisioning rate (Figure 3b; effect size  $\pm$  S.E. =  $-0.15 \pm 0.21$ ; the model  
503 containing the mean-centered-prolactin predictor scored 1.87 AICc points weaker than an intercept-only  
504 model) or mean provisioning visit duration (Figure 3d; effect size  $\pm$  S.E. =  $-0.049 \pm 0.081$ ; the model  
505 containing the mean-centered prolactin predictor scored 2.03 AICc points weaker than an intercept-only  
506 model).

507

508  
509

510

511

512

513

514

515

516

517

518

519

520

521

522

523

524

525

526

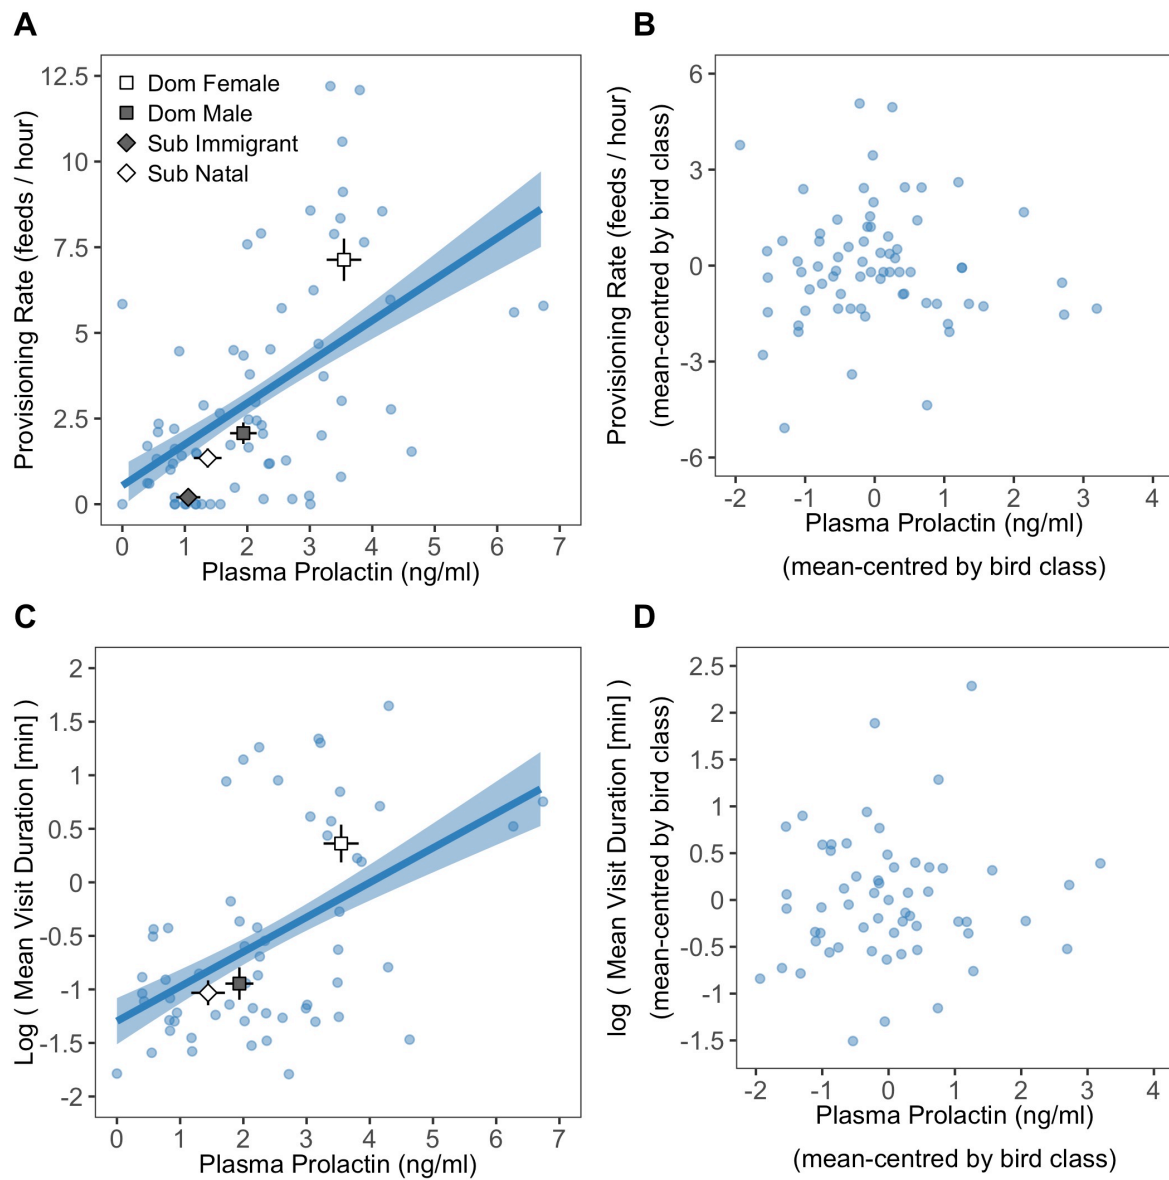

527

528

529

530

531

532

533

534

**Figure 3.** At the population level, considering all bird classes together, natural variation in circulating prolactin levels predicts variation in both (a) provisioning rate and (c) mean provisioning visit duration. These relationships are driven principally by differences among the mean trait values of the different focal bird classes (presented  $\pm$  S.E. by the squares and diamonds within panels a and c; see legend within panel a). Follow-up analyses revealed no evidence that variation in prolactin levels *within* these bird classes predicted within-bird-class variation in either (b) provisioning rate or (d) mean provisioning visit duration. In panels a and c the line and shaded ribbon present the predicted mean relationship and its standard error, while the shaded circular points within all panels present the raw data points.

535 DISCUSSION

536 This study investigated the hypothesis that prolactin plays a role in the regulation of nestling  
537 provisioning, both among dominant birds (engaged in parental care) and subordinate birds (that engage  
538 in cooperative helping behavior), in cooperatively breeding white-browed sparrow weaver societies.  
539 Among dominants engaged in parental care, we found that the dominant female (the mother) fed  
540 offspring at higher rates, made longer provisioning visits and had higher circulating prolactin levels than  
541 the dominant male (typically the father). Among subordinates, we found that natal subordinates helped  
542 to feed offspring at higher rates and had higher circulating prolactin levels than immigrant subordinates.  
543 Indeed, when all bird classes were combined, we found that continuous variation in the circulating  
544 prolactin levels of the birds predicted continuous variation in their provisioning rates and mean  
545 provisioning visit durations. These patterns appear to be driven principally by correlated differences  
546 among the four different bird classes in their prolactin levels and provisioning traits. We found no  
547 evidence that the more limited variation in circulating prolactin levels within the different bird classes  
548 predicted the more limited within-class variation in their provisioning traits. Together, these findings are  
549 broadly consistent with the hypothesis that parental care and cooperative helping behavior are regulated  
550 by a common underlying mechanism, and the hypothesis that prolactin plays a role in that pathway, but  
551 also highlight the need for experimental studies to now probe the causality and nature of any role for  
552 prolactin. Below, we discuss potential explanations for these findings, the different roles that prolactin  
553 could conceivably play in the regulation of parenting and cooperative helping in this species, and the  
554 wider implications of our findings for mechanistic and evolutionary research on cooperative behavior.

555

556 While our findings are broadly consistent with the hypothesis that parental care and helping behavior  
557 are regulated by a common mechanism in which prolactin plays a role, the lack of a relationship between  
558 within-class variation in prolactin levels and provisioning traits, coupled with the correlative nature of our  
559 findings, leave it important to consider the range of possible roles that prolactin could play in the  
560 regulation of provisioning behavior in this species. At least three main possibilities exist, which will now



561 require careful experimentation to tease apart. First, it is possible that circulating prolactin is one key  
562 regulator of continuous variation in individual contributions to offspring provisioning, both among parents  
563 and helpers. While most of our findings are consistent with this hypothesis, the absence of evident  
564 relationships between within-class variation in prolactin levels and provisioning traits complicates this  
565 view. However, the lack of *within*-class relationships could be attributable simply to a major source of  
566 variation in both traits (*among*-class variation) having been factored out at this stage, leaving these  
567 within-class analyses seeking more subtle prolactin-provisioning relationships (than those at the  
568 population level) that could be obscured by a number of mechanisms. For example, difficulties with the  
569 synchronous and accurate assessment of both prolactin levels and provisioning rates could have yielded  
570 noise in the data set that precluded the detection of these more subtle prolactin-provisioning  
571 relationships. While we sampled birds for prolactin on the evening following the morning provisioning-  
572 monitoring session (a time lag comparable to, or shorter than, those of similar studies; e.g. Duckworth  
573 et al. 2003, Ouyang et al. 2011), individuals may have differed in the way that their prolactin levels  
574 changed during the day, leaving their evening prolactin levels only a modest proxy for those while  
575 provisioning. The focal birds also varied in the timing of blood sampling, and while our analyses did not  
576 detect any overall effects on prolactin levels of the time lags either from sunset to capture or from capture  
577 to sampling, any individual variation in the circadian rhythm of prolactin secretion or in the prolactin  
578 stress response (if this species shows one; Krause et al. 2015) could have further decoupled the  
579 assessed prolactin levels from those during provisioning. Ultimately though, even if prolactin levels were  
580 a key regulator of provisioning behavior, alternative mechanisms are also expected to impact  
581 provisioning rates potentially independent of circulating prolactin levels, leaving the relationship between  
582 natural variation in prolactin levels and provisioning behavior potentially modest in the first place  
583 (Schoech et al. 1998, Angelier et al. 2016). Key among these could be (i) variation in other components  
584 of a prolactin-mediated pathway (such as inter-individual and temporal variation in the density of  
585 prolactin receptors; Zhou et al. 1996, Ohkubo et al. 1998), as well as (ii) mechanisms that may impact  
586 provisioning behavior via prolactin-independent pathways (e.g. the effects of circulating testosterone;  
587 Schoech et al. 1998). Moreover, even if prolactin levels determined provisioning 'motivation', the extent

588 to which variation in provisioning motivation was reflected in provisioning rates would depend upon the  
589 prey capture skills of the focal bird and the environmental availability of prey. Indeed, all points  
590 considered, it is arguably mechanistically naïve to expect particularly fine-grained associations between  
591 the levels of a single hormone and behavior to be evident in natural populations even where a causal  
592 link exists. To now robustly test the hypothesis that prolactin regulates continuous variation in the  
593 magnitude of individual contributions to offspring provisioning, there is a need to experimentally elevate  
594 the circulating prolactin levels of actively provisioning birds whose natural prolactin levels are not at the  
595 upper end of the physiological range (dominant males and natal subordinates may serve this purpose  
596 well; Figure 3a). This manipulation would allow one to test the key prediction that an increase in the  
597 prolactin levels of an actively provisioning bird will cause it to increase its provisioning rate; a prediction  
598 that to our knowledge has yet to best tested in either a parenting or helping context (the few experimental  
599 elevations of endogenous prolactin secretion in a provisioning context to date have focussed on the  
600 establishment of provisioning in non-provisioning birds rather than its quantitative variation within  
601 actively provisioning birds; e.g. Badyaev and Duckworth 2005).

602

603 A second potential explanation for the balance of our findings is that prolactin could instead play a causal  
604 role in the onset and maintenance of provisioning behavior among parents and helpers, without playing  
605 a role in the quantitative regulation of contributions to provisioning among actively provisioning birds.  
606 For example, a threshold level of prolactin may be required for the onset and/or maintenance of  
607 provisioning behavior (Angelier et al. 2006, Boos et al. 2007). Under this scenario, the higher prolactin  
608 levels of natal subordinates and dominant birds, relative to immigrant subordinates, could be causally  
609 responsible for the former bird classes engaging in provisioning while the latter typically did not. This  
610 could be the case without prolactin playing any causal role in regulating continuous variation in the  
611 provisioning rates of actively provisioning birds; a scenario that could account for the lack of within-class  
612 correlations between prolactin levels and provisioning behavior. The elevated prolactin levels of  
613 dominant females (relative to dominant males and natal subordinates) could conceivably be a

614 downstream consequence of either a role for prolactin in incubation (Buntin 1996, Sharp et al. 1998,  
615 Khan et al. 2001; as dominant females are the sole incubator in this species) and/or their differential  
616 exposure to offspring cues during the nestling period (which can increase prolactin secretion; Hall 1987,  
617 Sharp et al. 1998), given their markedly higher provisioning rates and mean visit durations than other  
618 classes. The hypothesis that prolactin maintains provisioning behavior but does not quantitatively  
619 regulate contributions to it could now be tested by (i) experimentally elevating the prolactin levels of  
620 subordinate immigrants, to test the key prediction that this would cause these typically non-provisioning  
621 birds to commence provisioning behavior (e.g. see Badyaev and Duckworth (2005) for a rare  
622 demonstration of this transition in the context of parental nestling feeding), (ii) experimentally reducing  
623 the prolactin levels of the actively-provisioning classes to test whether this eliminates provisioning  
624 behavior (e.g. Smiley and Adkins-Regan 2018), and (iii) experimentally elevating the prolactin levels of  
625 actively provisioning dominant males and/or natal subordinates (the manipulation proposed in the  
626 previous paragraph), as doing so should *not* increase their provisioning rates if prolactin merely  
627 maintains provisioning behavior without regulating contributions to it.

628

629 Given the correlative nature of our findings, it is also conceivable that prolactin plays no role in the onset,  
630 maintenance or quantitative regulation of parenting and cooperative helping behavior. Under this  
631 scenario, one might attribute the evident associations between prolactin and provisioning to a 'reverse  
632 causal' relationship, in which provisioning interactions with offspring stimulate prolactin release (Hall  
633 1987, Sharp et al. 1998). However, such a reverse causal argument alone cannot readily account for  
634 our findings in their entirety, as within-class variation in provisioning rates and mean provisioning visit  
635 durations were not evidently associated with circulating prolactin levels (though, again, the lack of such  
636 an association could be attributable to challenges with accurately and simultaneously quantifying both  
637 hormone and behavior; see above). When considering whether our findings could be attributable solely  
638 to effects of provisioning behavior on prolactin levels (i.e. in the absence of any effect of prolactin on  
639 provisioning), it is worth considering why selection would have left prolactin levels sensitive to offspring

640 interactions in the first place. Arguably the most plausible explanation is that such a mechanism plays  
641 a role in a feedback loop in which a causal relationship exists in both directions: if prolactin did establish,  
642 maintain and/or quantitatively regulate care, selection may have favored regulating prolactin secretion  
643 according to offspring interactions in order to maintain care as long as offspring survive and/or regulate  
644 care according to offspring viability or need (Hall 1987, Sharp et al. 1998, Angelier et al. 2016). As such,  
645 where offspring cues do stimulate prolactin release, such a relationship might generally be expected to  
646 occur alongside causal effects of prolactin on care. While the experiments outlined above would shed  
647 light on the causality of the prolactin-provisioning associations detected here, wider investigations are  
648 also needed to probe the role, if any, that such a feedback loop (with causal relationships in both  
649 directions) may play in the maintenance and/or regulation of cooperative care.

650

651 Our analyses revealed evidence that the circulating prolactin levels of subordinates were lower in larger  
652 social groups, but that the same relationship was not apparent among dominants. This finding is notable  
653 in that it parallels the apparent effects of group size on survival in this study population: subordinate  
654 birds are markedly less likely to survive in larger groups, but the same is not true for dominants  
655 (O'Callaghan & Young *unpublished data*). This survival relationship may be driven by enhanced foraging  
656 competition in larger groups (which subordinates may suffer from to a greater extent than dominants,  
657 given their lower rank), as territory size does not increase proportionally with group size (Martin-Taylor  
658 2018; likely leaving resources more strongly contested in larger groups). Accordingly, subordinates in  
659 larger groups show significantly lower body condition (O'Callaghan & Young *unpublished data*); a  
660 relationship that could conceivably account for their reduced prolactin levels in larger groups too.  
661 Chronic exposure to nutritionally stressful conditions is often associated with reduced prolactin levels; a  
662 relationship that could be due in part to negative effects of circulating corticosterone on prolactin release  
663 (Delehanty et al. 1997, Criscuolo et al. 2005, Angelier and Chastel 2009, Riechert et al. 2014, Angelier  
664 et al. 2016). Indeed, as the Kalahari experienced drought conditions during the two years of this study,  
665 such negative effects of environmental stress on prolactin release might also explain why the plasma

666 prolactin concentrations detected here were lower than those generally reported in studies of other  
667 passerines engaged in care (e.g. Vleck et al. 1991, Schoech et al. 1996, Khan et al. 2001, Duckworth  
668 et al. 2003, Ouyang et al. 2011).

669

670 While experimental tests of causality are needed (see above), our findings are broadly consistent with  
671 the hypothesis that pre-existing mechanisms that regulated parental care in ancestral bi-parental  
672 species were co-opted for the regulation of cooperative helping behavior on the evolution of cooperative  
673 breeding. The possibility that parenting and cooperative helping are indeed regulated by a common  
674 mechanism has important evolutionary implications. Explanations for the evolution, maintenance and  
675 optimization of cooperative behavior typically focus on the roles of the fitness benefits and costs of  
676 cooperation *per se*. However, if cooperation and parenting *are* regulated by a common underlying  
677 mechanism it is conceivable that this shared architecture for the regulation of care-giving is shaped as  
678 much by the payoffs from its expression in a parental context as by the payoffs from its expression in a  
679 cooperative helping context. While selection might independently optimize parental and helper caring  
680 strategies (e.g. via the evolution of an entirely context-dependent caring strategy), it is conceivable that  
681 mechanistic constraints may preclude their independent optimization. For example, genetic variants that  
682 modified a bird's sensitivity to begging could conceivably impact both its parental and cooperative care,  
683 yielding scope for intra-locus genetic conflict to constrain the independent optimization of both parental  
684 and cooperative care (Pennell et al. 2018, see also the conceptual parallels with sexual conflict: Stewart  
685 et al. 2010, Pennell and Morrow 2013). Where this is the case, attempts to understand the evolutionary  
686 origins, maintenance and optimization of cooperative behavior may require attention to the extent to  
687 which genetic correlations exist between parental and cooperative behavior. Notably, our findings  
688 suggest that helping behavior in sparrow-weaver societies is not maintained by selection solely because  
689 a genetic correlation with parenting has precluded the evolution of 'non-helping' (see Brown and Vleck  
690 1998 for a similar debate), because a context-dependent helping strategy appears to have evolved.  
691 Subordinates routinely help while within their natal groups but typically cease to do so as immigrants

692 (when their low relatedness to the brood would markedly reduce their indirect fitness payoff from helping;  
693 Harrison et al. 2013a).

694

## 695 **Conclusion**

696 Our findings lend new support to the hypotheses that helping behavior in cooperatively breeding  
697 societies has shared mechanistic underpinnings with parental care, and that prolactin plays a key role  
698 in this pathway (see also Vleck et al., 1991; Schoech et al., 1996; Khan et al., 2001; Carlson et al.,  
699 2006). Our findings and their complexity highlight the need for experimental studies to investigate both  
700 the causality and nature of the relationship between prolactin and provisioning in this species, in both  
701 parental and cooperative contexts. Our findings also highlight that attempts to understand the evolution  
702 of cooperative helping may benefit from attention to the possibility of genetic constraints on the  
703 independent optimization of cooperation and parenting. Our study has implications too for the growing  
704 interest in the mechanistic origins of consistent individual differences in cooperative behavior  
705 (Sanderson et al. 2015, Dantzer et al. 2019). Specifically, our findings highlight that such differences  
706 could arise from consistent individual differences within the pathway by which prolactin acts (e.g. via  
707 differences in prolactin secretion and/or reception; Ohkubo et al. 1998, Zhou et al. 1996).

708

## 709 **ACKNOWLEDGMENTS**

710 We thank all contributors to our long-term database, and Darren O'Connell for support with data  
711 collection. We also thank E.O. and Son and all at Tswalu Kalahari Reserve for access to our field site  
712 and exceptional logistical support (with particular gratitude to Cornelia le Roux and Dylan Smith), and  
713 the Northern Cape Conservation Authority for granting permission to conduct our research. We are  
714 grateful to D. L. Cram for assistance in training in bird capture and blood sampling, J.L. McDonald and  
715 K.J. Walker for useful comments on an earlier draft, and to P. Capilla-Lasheras for statistical advice.  
716 L.A.W. was funded by a NERC PhD studentship (NE/J500185/1). J.E.Y. was funded by the BBSRC

717 (BB/H022716/1). S.L.M. was funded by Roslin Institute Strategic Grant funding from the BBSRC  
718 (BB/P013759/1). A.J.Y. was funded by BBSRC David Phillips and NERC Blue Skies Research  
719 Fellowships (BB/H022716/1 and NE/E013481/1). We dedicate this manuscript to our co-author Peter  
720 Sharp (P.J.S.), whose openness and interest in this project were key to its inception, and whose wider  
721 contributions to avian endocrinology we celebrate. Any errors are our own, as he did not have a chance  
722 to comment on the final manuscript.

723

## 724 REFERENCES

725

- 726 Angelier, F., C. Barbraud, H. Lormee, F. Prud'homme, and O. Chastel. 2006. Kidnapping of chicks in  
727 emperor penguins: a hormonal by-product? *Journal of Experimental Biology* **209**:1413-1420.
- 728 Angelier, F., and O. Chastel. 2009. Stress, prolactin and parental investment in birds: A review.  
729 *General and Comparative Endocrinology* **163**:142-148.
- 730 Angelier, F., J. C. Wingfield, S. Tartu, and O. Chastel. 2016. Does prolactin mediate parental and life-  
731 history decisions in response to environmental conditions in birds? A review. *Horm Behav*  
732 **77**:18-29.
- 733 Arnold, T. W. 2010. Uninformative parameters and model selection using Akaike's Information  
734 Criterion. *Journal of Wildlife Management* **74**:1175-1178.
- 735 Badyaev, A., and R. A. Duckworth. 2005. Evolution of plasticity in hormonally-integrated parental  
736 tactics: An example with the house finch. Pages 375-386 *in* A. Dawson and P. J. Sharp,  
737 editors. *Functional Avian Endocrinology*. Narosa Publishing House, New Delhi, India.
- 738 Bates, D., M. Machler, B. M. Bolker, and S. C. Walker. 2015. Fitting Linear Mixed-Effects Models  
739 Using lme4. *Journal of Statistical Software* **67**:1-48.
- 740 Bender, N., M. Taborsky, and D. M. Power. 2008. The role of prolactin in the regulation of brood care  
741 in the cooperatively breeding fish *Neolamprologus pulcher*. *J Exp Zool A Ecol Genet Physiol*  
742 **309**:515-524.
- 743 Boos, M., C. Zimmer, A. Carriere, J. P. Robin, and O. Petit. 2007. Post-hatching parental care  
744 behaviour and hormonal status in a precocial bird. *Behavioural Processes* **76**:206-214.
- 745 Brown, J. L., and C. M. Vleck. 1998. Prolactin and helping in birds: has natural selection strengthened  
746 helping behavior? *Behavioral Ecology* **9**:541-545.
- 747 Buntin, J. D. 1996. Neural and hormonal control of parental behavior in birds. *Advances in the Study*  
748 *of Behavior* **25**:161-213.

- 749 Burnham, K. P., and D. R. Anderson. 2002. Model Selection and Multimodel Inference. 2 edition.  
750 Springer-Verlag New York, New York.
- 751 Capilla-Lasheras, P. 2019. The evolution of cooperation in an arid-zone bird: bet-hedging, plasticity  
752 and constraints. University of Exeter, University of Exeter.
- 753 Capilla-Lasheras, P., E. M. Wood, X. Harrison, A. J. Wilson, and A. J. Young. 2021. Altruistic bet-  
754 hedging and the evolution of cooperation in a Kalahari bird. *Science Advances* **7**:eabe8980.
- 755 Carlson, A. A., M. B. Manser, A. J. Young, A. F. Russell, N. R. Jordan, A. S. McNeilly, and T. Clutton-  
756 Brock. 2006a. Cortisol levels are positively associated with pup-feeding rates in male  
757 meerkats. *Proceedings of the Royal Society of London Series B-Biological Sciences* **273**:571-  
758 577.
- 759 Carlson, A. A., L. Nicol, A. J. Young, A. F. Parlow, and A. S. McNeilly. 2003. Radioimmunoassay of  
760 prolactin for the meerkat (*Suricata suricatta*), a cooperatively breeding carnivore. *General and*  
761 *Comparative Endocrinology* **130**:148-156.
- 762 Carlson, A. A., A. F. Russell, A. J. Young, N. R. Jordan, A. S. McNeilly, A. F. Parlow, and T. Clutton-  
763 Brock. 2006b. Elevated prolactin levels immediately precede decisions to babysit by male  
764 meerkat helpers. *Hormones and Behavior* **50**:94-100.
- 765 Chastel, O., A. Lacroix, H. Weimerskirch, and G. W. Gabrielsen. 2005. Modulation of prolactin but not  
766 corticosterone responses to stress in relation to parental effort in a long-lived bird. *Hormones*  
767 *and Behavior* **47**:459-466.
- 768 Chastel, O., and H. Lormee. 2002. Patterns of prolactin secretion in relation to incubation failure in a  
769 tropical seabird, the red-footed booby. *Condor* **104**:873-876.
- 770 Cockburn, A. 1998. Evolution of helping behavior in cooperatively breeding birds. *Annual Review of*  
771 *Ecology and Systematics* **29**:141-177.
- 772 Cornwallis, C. K., S. A. West, K. E. Davis, and A. S. Griffin. 2010. Promiscuity and the evolutionary  
773 transition to complex societies. *Nature* **466**:969-U991.
- 774 Cram, D. L., J. D. Blount, and A. J. Young. 2015a. The oxidative costs of reproduction are group-size  
775 dependent in a wild cooperative breeder. *Proceedings of the Royal Society B-Biological*  
776 *Sciences* **282**.
- 777 Cram, D. L., J. D. Blount, and A. J. Young. 2015b. Oxidative status and social dominance in a wild  
778 cooperative breeder. *Functional Ecology* **29**:229-238.
- 779 Criscuolo, F., O. Chastel, F. Bertile, G. W. Gabrielsen, Y. Le Maho, and T. Raclot. 2005.  
780 Corticosterone alone does not trigger a short term behavioural shift in incubating female  
781 common eiders *Somateria mollissima*, but does modify long term reproductive success.  
782 *Journal of Avian Biology* **36**:306-312.
- 783 Dantzer, B., C. Dubuc, I. B. Goncalves, D. L. Cram, N. C. Bennett, A. Ganswindt, M. Heistermann, C.  
784 Duncan, D. Gaynor, and T. H. Clutton-Brock. 2019. The development of individual differences



- 785 in cooperative behaviour: maternal glucocorticoid hormones alter helping behaviour of  
786 offspring in wild meerkats. *Philos Trans R Soc Lond B Biol Sci* **374**:20180117.
- 787 Dantzer, B., I. B. Goncalves, H. C. Spence-Jones, N. C. Bennett, M. Heistermann, A. Ganswindt, C.  
788 Dubuc, D. Gaynor, M. B. Manser, and T. H. Clutton-Brock. 2017. The influence of stress  
789 hormones and aggression on cooperative behaviour in subordinate meerkats. *Proc Biol Sci*  
790 **284**.
- 791 Delehanty, D. J., L. W. Oring, A. J. Fivizzani, and M. E. ElHalawani. 1997. Circulating prolactin of  
792 incubating male Wilson's Phalaropes corresponds to clutch size and environmental stress.  
793 *Condor* **99**:397-405.
- 794 Dickinson, J. L., and B. J. Hatchwell. 2004. Fitness consequences of helping. Pages 48-66 *in* W. D.  
795 Koenig and J. L. Dickinson, editors. *Ecology and Evolution of Cooperative Breeding in Birds*.  
796 Cambridge University Press, Cambridge.
- 797 Duckworth, R. A., A. V. Badyaev, and A. F. Parlow. 2003. Elaborately ornamented males avoid costly  
798 parental care in the house finch (*Carpodacus mexicanus*): a proximate perspective. *Behavioral*  
799 *Ecology and Sociobiology* **55**:176-183.
- 800 English, S., S. Nakagawa, and T. H. Clutton-Brock. 2010. Consistent individual differences in  
801 cooperative behaviour in meerkats (*Suricata suricatta*). *Journal of Evolutionary Biology*  
802 **23**:1597-1604.
- 803 Hall, M. R. 1987. External stimuli affecting incubation behavior and prolactin secretion in the duck  
804 (*Anas platyrhynchos*). *Horm Behav* **21**:269-287.
- 805 Harrison, X., J. York, D. Cram, M. Hares, and A. Young. 2013a. Complete reproductive skew within  
806 white-browed sparrow weaver groups despite outbreeding opportunities for subordinates of  
807 both sexes. *Behavioral Ecology and Sociobiology* **67**:1915-1929.
- 808 Harrison, X. A., J. E. York, D. L. Cram, and A. J. Young. 2013b. Extra-group mating increases  
809 inbreeding risk in a cooperatively breeding bird. *Molecular Ecology* **22**:5700-5715.
- 810 Harrison, X. A., J. E. York, and A. J. Young. 2014. Population genetic structure and direct  
811 observations reveal sex-reversed patterns of dispersal in a cooperative bird. *Molecular Ecology*  
812 **23**:5740-5755.
- 813 Houslay, T. M., R. L. Earley, A. J. Young, and A. J. Wilson. 2019. Habituation and individual variation  
814 in the endocrine stress response in the Trinidadian guppy (*Poecilia reticulata*). *Gen Comp*  
815 *Endocrinol* **270**:113-122.
- 816 Khan, M. Z., F. M. A. McNabb, J. R. Walters, and P. J. Sharp. 2001. Patterns of testosterone and  
817 prolactin concentrations and reproductive behavior of helpers and breeders in the  
818 cooperatively breeding red-cockaded woodpecker (*Picoides borealis*). *Hormones and Behavior*  
819 **40**:1-13.

- 820 Koenig, W. D., and J. L. Dickinson, editors. 2004. Ecology and Evolution of Cooperative Breeding in  
821 Birds. Cambridge University Press, Cambridge.
- 822 Koenig, W. D., and J. L. Dickinson, editors. 2016. Cooperative breeding in vertebrates: studies of  
823 ecology, evolution and behavior. Cambridge University Press.
- 824 Krause, J. S., S. L. Meddle, and J. C. Wingfield. 2015. The Effects of Acute Restraint Stress on  
825 Plasma Levels of Prolactin and Corticosterone across Life-History Stages in a Short-Lived  
826 Bird: Gambel's White-Crowned Sparrow (*Zonotrichia leucophrys gambelii*). *Physiol Biochem*  
827 *Zool* **88**:589-598.
- 828 Leitner, S., P. Mundy, and C. Voigt. 2009. Morphometrics of White-browed Sparrow-Weavers  
829 *Plocepasser mahali* in south-western Zimbabwe. *Ostrich* **80**:99-102.
- 830 Lewis, D. M. 1982. Cooperative Breeding in a Population of White-Browed Sparrow Weavers  
831 *Plocepasser-Mahali*. *Ibis* **124**:511-522.
- 832 Lukas, D., and T. Clutton-Brock. 2012. Cooperative breeding and monogamy in mammalian societies.  
833 *Proceedings of the Royal Society B-Biological Sciences* **279**:2151-2156.
- 834 Martin-Taylor, C. M. 2018. The impacts of out-group threats on within- and between-group behaviours  
835 in the cooperatively breeding white-browed sparrow-weaver. University of Exeter.
- 836 Ohkubo, T., M. Tanaka, K. Nakashima, and P. J. Sharp. 1998. Relationship between prolactin  
837 receptor mRNA in the anterior pituitary gland and hypothalamus and reproductive state in male  
838 and female bantams (*Gallus domesticus*). *General and Comparative Endocrinology* **111**:167-  
839 176.
- 840 Ouyang, J. Q., P. J. Sharp, A. Dawson, M. Quetting, and M. Hau. 2011. Hormone levels predict  
841 individual differences in reproductive success in a passerine bird. *Proceedings of the Royal*  
842 *Society B-Biological Sciences* **278**:2537-2545.
- 843 Pennell, T. M., L. Holman, E. H. Morrow, and J. Field. 2018. Building a new research framework for  
844 social evolution: intralocus caste antagonism. *Biological Reviews* **93**:1251-1268.
- 845 Pennell, T. M., and E. H. Morrow. 2013. Two sexes, one genome: the evolutionary dynamics of  
846 intralocus sexual conflict. *Ecology and Evolution* **3**:1819-1834.
- 847 Richards, S. A. 2008. Dealing with overdispersed count data in applied ecology. *Journal of Applied*  
848 *Ecology* **45**:218-227.
- 849 Richards, S. A., M. J. Whittingham, and P. A. Stephens. 2011. Model selection and model averaging  
850 in behavioural ecology: the utility of the IT-AIC framework. *Behavioral Ecology and*  
851 *Sociobiology* **65**:77-89.
- 852 Riechert, J., P. H. Becker, and O. Chastel. 2014. Predicting reproductive success from hormone  
853 concentrations in the common tern (*Sterna hirundo*) while considering food abundance.  
854 *Oecologia* **176**:715-727.

- 855 Sanderson, J. L., I. Stott, A. J. Young, E. I. K. Vitikainen, S. J. Hodge, and M. A. Cant. 2015. The  
856 origins of consistent individual differences in cooperation in wild banded mongooses, *Mungos*  
857 *mungo*. *Animal Behaviour* **107**:193-200.
- 858 Sanderson, J. L., A. J. Young, S. J. Hodge, S. Kyabulima, S. L. Walker, and M. A. Cant. 2014.  
859 Hormonal mediation of a carry-over effect in a wild cooperative mammal. *Functional Ecology*  
860 **28**:1377-1386.
- 861 Schoech, S. J., E. D. Ketterson, V. Nolan, P. J. Sharp, and J. D. Buntin. 1998. The effect of  
862 exogenous testosterone on parental behavior, plasma prolactin, and prolactin binding sites in  
863 dark-eyed juncos. *Hormones and Behavior* **34**:1-10.
- 864 Schoech, S. J., R. L. Mumme, and J. C. Wingfield. 1996. Prolactin and helping behaviour in the  
865 cooperatively breeding Florida scrub-jay, *Aphelocoma coerulescens*. *Animal Behaviour*  
866 **52**:445-456.
- 867 Schoech, S. J., S. J. Reynolds, and R. K. Boughton. 2004. *Endocrinology*. Pages 128-141 in W. D.  
868 Koenig and J. L. Dickinson, editors. *Ecology and Evolution of Cooperative Breeding in Birds*.  
869 Cambridge University Press, Cambridge.
- 870 Sharp, P. J., A. Dawson, and R. W. Lea. 1998. Control of luteinizing hormone and prolactin secretion  
871 in birds. *Comparative Biochemistry and Physiology C-Pharmacology Toxicology &*  
872 *Endocrinology* **119**:275-282.
- 873 Smiley, K. O., and E. Adkins-Regan. 2018. Lowering prolactin reduces post-hatch parental care in  
874 male and female zebra finches (*Taeniopygia guttata*). *Horm Behav* **98**:103-114.
- 875 Soares, M. C., R. Bshary, L. Fusani, W. Goymann, M. Hau, K. Hirschenhauser, and R. F. Oliveira.  
876 2010. Hormonal mechanisms of cooperative behaviour. *Philosophical Transactions of the*  
877 *Royal Society B-Biological Sciences* **365**:2737-2750.
- 878 Sockman, K. W., H. Schwabl, and P. J. Sharp. 2000. The role of prolactin in the regulation of clutch  
879 size and onset of incubation behavior in the American kestrel. *Hormones and Behavior* **38**:168-  
880 176.
- 881 Solomon, N. G., and J. A. French, editors. 1997. *Cooperative Breeding in Mammals*. Cambridge  
882 University Press, Cambridge.
- 883 Stewart, A. D., A. Pischedda, and W. R. Rice. 2010. Resolving Intralocus Sexual Conflict: Genetic  
884 Mechanisms and Time Frame. *Journal of Heredity* **101**:S94-S99.
- 885 Vleck, C. M., N. A. Mays, J. W. Dawson, and A. R. Goldsmith. 1991. Hormonal Correlates of Parental  
886 and Helping-Behavior in Cooperatively Breeding Harris Hawks (*Parabuteo-Unicinctus*). *Auk*  
887 **108**:638-648.
- 888 Voigt, C., S. Leitner, and M. Gahr. 2007. Socially induced brain differentiation in a cooperatively  
889 breeding songbird. *Proceedings of the Royal Society of London Series B-Biological Sciences*  
890 **274**:2645-2652.

- 891 Walker, L. A. 2016. The evolution and regulation of cooperation in the wild. University of Exeter.
- 892 Walker, L. A., J. E. York, and A. J. Young. 2016. Sexually selected sentinels? Evidence of a role for  
893 intrasexual competition in sentinel behavior. *Behavioral Ecology* **27**:1461-1470.
- 894 Wingfield, J. C., and D. M. Lewis. 1993. Hormonal and Behavioral-Responses to Simulated Territorial  
895 Intrusion in the Cooperatively Breeding White-Browed Sparrow Weaver, *Plocepasser-Mahali*.  
896 *Animal Behaviour* **45**:1-11.
- 897 Wood, E. M., P. Capilla-Lasheras, D. L. Cram, L. A. Walker, J. E. York, A. Lange, P. B. Hamilton, C.  
898 R. Tyler, and A. J. Young. 2021. Social dominance and rainfall predict telomere dynamics in a  
899 cooperative arid-zone bird. *Mol Ecol*.
- 900 York, J. E., A. N. Radford, B. de Vries, T. G. Groothuis, and A. J. Young. 2016. Dominance-related  
901 seasonal song production is unrelated to circulating testosterone in a subtropical songbird.  
902 *General and Comparative Endocrinology* **233**:43-52.
- 903 York, J. E., K. J. Wells, and A. J. Young. 2019. Dominance-related contributions to collective territory  
904 defence are adjusted according to the threat. *Animal Behaviour* **158**:25-34.
- 905 Young, A. J., A. A. Carlson, and T. H. Clutton-Brock. 2005. Trade-offs between extra-territorial  
906 prospecting and helping in a cooperative mammal. *Animal Behaviour* **70**:829-837.
- 907 Zhou, J. F., D. Zadworny, D. Guemene, and U. Kuhnlein. 1996. Molecular cloning, tissue distribution,  
908 and expression of the prolactin receptor during various reproductive states in *Meleagris*  
909 *gallopavo*. *Biology of Reproduction* **55**:1081-1090.
- 910 Ziegler, T. E. 2000. Hormones associated with non-maternal infant care: A review of mammalian and  
911 avian studies. *Folia Primatologica* **71**:6-21.

912

913 APPENDIX A

914 **Table A1. Top model sets prior to applying the model nesting rule when modelling the**  
 915 **Provisioning Behavior and Prolactin Levels of DOMINANTS**

916 Model selection of the factors affecting the (i) nestling provisioning rates, (ii) mean provisioning visit  
 917 durations and (iii) prolactin levels of dominant females ('Dom Fem') and dominant males ('Dom Male')  
 918 engaged in parental care. This table shows all models within <6  $\Delta$ AIC of the top model, *prior to* applying  
 919 the model nesting rule (Richards et al., 2011; see methods). Table 1 in the main paper presents the  
 920 subset of these models that were retained *after* applying the model nesting rule (which are flagged here  
 921 with 'YES' in the 'Retained' column). The grey lines indicate the response term for the set of models  
 922 beneath it. The presence of a continuous variable within a focal model is indicated by the presence of  
 923 its effect size estimate, while the presence of factorial variable is indicated with a '+'. The 'Year' effect  
 924 is the change from 2013 to 2014. 'Int' = Intercept. 'df' = degrees of freedom.

925

926

| Model Number                               | Int   | Bird Class (Sub Natal vs Sub Imm) | Brood Size | Group Size | Year | Sunset to Capture Lag | Capture to Bleed lag | df | AICc   | $\Delta$ AICc | Retain |
|--------------------------------------------|-------|-----------------------------------|------------|------------|------|-----------------------|----------------------|----|--------|---------------|--------|
| Provisioning Rate (feeds / hr)             |       |                                   |            |            |      |                       |                      |    |        |               |        |
| 4                                          | -0.36 | +                                 | 1.44       |            |      | N/A                   | N/A                  | 6  | 205.78 | 0.00          | YES    |
| 12                                         | -0.29 | +                                 | 1.08       |            | +    | N/A                   | N/A                  | 7  | 206.06 | 0.28          |        |
| 11                                         | 1.21  | +                                 |            |            | +    | N/A                   | N/A                  | 6  | 207.70 | 1.92          | YES    |
| 8                                          | -0.19 | +                                 | 1.42       | -0.05      |      | N/A                   | N/A                  | 7  | 208.54 | 2.76          |        |
| 16                                         | -0.46 | +                                 | 1.08       | 0.05       | +    | N/A                   | N/A                  | 8  | 208.97 | 3.19          |        |
| 15                                         | 1.14  | +                                 |            | 0.02       | +    | N/A                   | N/A                  | 7  | 210.49 | 4.71          |        |
| 3                                          | 2.06  | +                                 |            |            |      | N/A                   | N/A                  | 5  | 211.76 | 5.98          | YES    |
| Mean Provisioning Visit Duration (minutes) |       |                                   |            |            |      |                       |                      |    |        |               |        |
| 3                                          | 0.58  | +                                 |            |            |      | N/A                   | N/A                  | 5  | 139.66 | 0.00          | YES    |
| 4                                          | 1.08  | +                                 | -0.30      |            |      | N/A                   | N/A                  | 6  | 141.08 | 1.42          |        |
| 11                                         | 0.71  | +                                 |            |            | +    | N/A                   | N/A                  | 6  | 141.79 | 2.13          |        |
| 7                                          | 0.37  | +                                 |            | 0.07       |      | N/A                   | N/A                  | 6  | 142.11 | 2.45          |        |
| 12                                         | 1.07  | +                                 | -0.26      |            | +    | N/A                   | N/A                  | 7  | 143.81 | 4.15          |        |
| 8                                          | 0.93  | +                                 | -0.28      | 0.04       |      | N/A                   | N/A                  | 7  | 143.84 | 4.18          |        |

|                          |      |   |      |      |   |     |         |         |        |        |      |
|--------------------------|------|---|------|------|---|-----|---------|---------|--------|--------|------|
| 15                       | 0.57 | + |      | 0.04 | + | N/A | N/A     | 7       | 144.55 | 4.89   |      |
| Plasma Prolactin (ng/ml) |      |   |      |      |   |     |         |         |        |        |      |
| 5                        | 1.98 | + |      |      |   |     |         | 5       | 149.62 | 0.00   | YES  |
| 7                        | 1.32 | + | 0.39 |      |   |     |         | 6       | 150.56 | 0.94   |      |
| 13                       | 1.31 | + |      | 0.23 |   |     |         | 6       | 150.68 | 1.07   |      |
| 15                       | 0.50 | + | 0.43 | 0.25 |   |     |         | 7       | 151.36 | 1.74   |      |
| 37                       | 1.77 | + |      |      | + |     |         | 6       | 151.41 | 1.79   |      |
| 45                       | 0.82 | + |      | 0.29 | + |     |         | 7       | 151.68 | 2.07   |      |
| 6                        | 2.51 | + |      |      |   |     | -0.0028 | 6       | 151.79 | 2.17   |      |
| 21                       | 2.03 | + |      |      |   |     | -0.0005 | 6       | 152.24 | 2.62   |      |
| 14                       | 1.81 | + |      | 0.22 |   |     | -0.0025 | 7       | 153.06 | 3.44   |      |
| 8                        | 1.76 | + | 0.37 |      |   |     | -0.0021 | 7       | 153.07 | 3.45   |      |
| 39                       | 1.32 | + | 0.33 |      | + |     |         | 7       | 153.17 | 3.55   |      |
| 23                       | 1.32 | + | 0.39 |      |   |     | -0.0001 | 7       | 153.35 | 3.73   |      |
| 29                       | 1.29 | + |      | 0.23 |   |     | 0.0001  | 7       | 153.48 | 3.86   |      |
| 47                       | 0.47 | + | 0.30 | 0.28 | + |     |         | 8       | 153.76 | 4.14   |      |
| 38                       | 2.17 | + |      |      | + |     | -0.0020 | 7       | 153.97 | 4.35   |      |
| 53                       | 1.86 | + |      |      | + |     | -0.0013 | 7       | 153.99 | 4.37   |      |
| 16                       | 0.89 | + | 0.41 | 0.25 |   |     | -0.0017 | 8       | 154.11 | 4.49   |      |
| 31                       | 0.42 | + | 0.44 | 0.26 |   |     | 0.0006  | 8       | 154.26 | 4.64   |      |
| 61                       | 0.90 | + |      | 0.29 | + |     | -0.0009 | 8       | 154.53 | 4.91   |      |
| 46                       | 1.09 | + |      | 0.29 | + |     | -0.0012 | 8       | 154.54 | 4.92   |      |
| 22                       | 2.54 | + |      |      |   |     | -0.0003 | -0.0027 | 7      | 154.57 | 4.95 |

928 **Table A2. Top model sets prior to applying the model nesting rule when modelling the**  
 929 **Provisioning Behavior and Prolactin Levels of SUBORDINATES**

930 Model selection of the factors affecting the (i) nestling provisioning rates and (ii) prolactin levels of natal  
 931 subordinates ('Sub Nat') and immigrant subordinates ('Sub Imm') engaged in cooperative helping  
 932 behavior. This table shows all models within <6  $\Delta$ AIC of the top model, *prior to* applying the model  
 933 nesting rule (Richards et al., 2011; see methods). Table 2 in the main paper presents the subset of  
 934 these models that were retained *after* applying the model nesting rule (which are flagged here with 'YES'  
 935 in the 'Retained' column). The grey lines indicate the response term for the set of models beneath it.  
 936 The presence of a continuous variable within a focal model is indicated by the presence of its effect size  
 937 estimate, while the presence of factorial variable is indicated with a '+'. The 'Year' effect is the change  
 938 from 2013 to 2014. 'Int' = Intercept. 'df' = degrees of freedom.

939

| Model Number                   | Int   | Bird Class (Sub Nat vs Sub Imm) | Brood Size | Group Size | Year | Sunset to Capture Lag | Capture to Bleed lag | df | AICc  | $\Delta$ AICc | Retain |
|--------------------------------|-------|---------------------------------|------------|------------|------|-----------------------|----------------------|----|-------|---------------|--------|
| Provisioning Rate (feeds / hr) |       |                                 |            |            |      |                       |                      |    |       |               |        |
| 4                              | -1.39 | +                               | 0.92       |            |      | N/A                   | N/A                  | 5  | 66.64 | 0.00          | YES    |
| 12                             | -1.40 | +                               | 1.12       |            | +    | N/A                   | N/A                  | 6  | 67.92 | 1.28          |        |
| 3                              | 0.12  | +                               |            |            |      | N/A                   | N/A                  | 4  | 68.77 | 2.13          | YES    |
| 8                              | -0.65 | +                               | 0.86       | -0.18      |      | N/A                   | N/A                  | 6  | 69.68 | 3.04          |        |
| 16                             | -0.30 | +                               | 1.06       | -0.27      | +    | N/A                   | N/A                  | 7  | 70.56 | 3.93          |        |
| 7                              | 1.22  | +                               |            | -0.31      |      | N/A                   | N/A                  | 5  | 70.73 | 4.09          |        |
| 11                             | 0.23  | +                               |            |            | +    | N/A                   | N/A                  | 5  | 71.79 | 5.15          |        |
| Plasma Prolactin (ng / ml)     |       |                                 |            |            |      |                       |                      |    |       |               |        |
| 45                             | 2.20  | +                               |            | -0.41      | +    |                       |                      | 6  | 57.13 | 0.00          | YES    |
| 13                             | 2.82  | +                               |            | -0.51      |      |                       |                      | 5  | 57.15 | 0.02          | YES    |
| 29                             | 2.47  | +                               |            | -0.48      |      | 0.0038                |                      | 6  | 59.10 | 1.97          |        |
| 46                             | 1.15  | +                               |            | -0.35      | +    |                       | 0.0038               | 7  | 59.22 | 2.09          |        |
| 15                             | 2.62  | +                               | 0.08       | -0.50      |      |                       |                      | 6  | 60.62 | 3.49          |        |
| 14                             | 2.83  | +                               |            | -0.51      |      |                       | 0.0000               | 6  | 60.76 | 3.62          |        |
| 61                             | 2.11  | +                               |            | -0.40      | +    | 0.0019                |                      | 7  | 60.78 | 3.65          |        |
| 47                             | 2.27  | +                               | -0.03      | -0.41      | +    |                       |                      | 7  | 61.17 | 4.04          |        |
| 33                             | 1.02  |                                 |            |            | +    |                       |                      | 4  | 61.28 | 4.15          | YES    |

|    |       |   |  |       |   |        |        |   |       |      |     |
|----|-------|---|--|-------|---|--------|--------|---|-------|------|-----|
| 9  | 2.74  |   |  | -0.34 |   |        |        | 4 | 61.42 | 4.29 | YES |
| 25 | 2.22  |   |  | -0.32 |   | 0.0057 |        | 5 | 61.62 | 4.49 |     |
| 38 | -0.86 | + |  |       | + |        | 0.0068 | 6 | 61.68 | 4.55 |     |
| 41 | 2.09  |   |  | -0.23 | + |        |        | 5 | 61.76 | 4.63 |     |
| 37 | 0.64  | + |  |       | + |        |        | 5 | 62.00 | 4.87 |     |
| 34 | 0.06  |   |  |       | + |        | 0.0046 | 5 | 62.57 | 5.43 |     |
| 30 | 2.37  | + |  | -0.48 |   | 0.0039 | 0.0004 | 7 | 63.12 | 5.99 |     |

940
